# Supplementary material
Source: publisher figshare collection journal article supplement (https://frontiersin.figshare.com/ndownloader/files/34975414)
Supplement: Supplementary file [file 34975414]

**Supplementary Table S3. Transcriptomic expression of *Aspergillus sydowii* EXF-12860's genes related to amino acid metabolism at 5.13 M NaCl compared to 1 M NaCl.**

| Amino acid metabolism | Transcript ID            | Description                                      | Gene ID       | LogFC  | FDR      |
|-----------------------|--------------------------|--------------------------------------------------|---------------|--------|----------|
| GLU                   | TRINITY_DN713_c0_g1_i7   | glutamate dehydrogenase                          | <i>gdh2</i>   | -11.72 | 6.97E-09 |
|                       | TRINITY_DN713_c0_g1_i4   |                                                  |               | -7.42  | 1.21E-06 |
| TYR/PHE               | TRINITY_DN759_c0_g1_i6   | 3-deoxy-7-phosphoheptulonate synthase            | <i>aroG</i>   | -11.50 | 1.56E-08 |
|                       | TRINITY_DN759_c0_g1_i15  |                                                  |               | -6.33  | 6.56E-06 |
| HIS                   | TRINITY_DN380_c0_g1_i3   | glucose-6-phosphate 1-dehydrogenase              | <i>g6pd</i>   | -11.22 | 2.99E-08 |
| GLY                   | TRINITY_DN1487_c0_g1_i12 | Cys-Gly metallodipeptidase                       | <i>dug1</i>   | -9.92  | 7.31E-07 |
|                       | TRINITY_DN1487_c0_g1_i5  |                                                  |               | -9.36  | 2.89E-06 |
|                       | TRINITY_DN1487_c0_g1_i2  |                                                  |               | -4.86  | 4.85E-04 |
|                       | TRINITY_DN1487_c0_g1_i1  |                                                  |               | -3.83  | 6.02E-03 |
| HIS                   | TRINITY_DN182_c0_g1_i6   | triosephosphate isomerase                        | <i>tpi1</i>   | -9.92  | 2.89E-07 |
| CYS                   | TRINITY_DN573_c0_g1_i9   | thiosulfate/3-mercaptopyruvate sulfurtransferase | <i>tst</i>    | -9.57  | 1.71E-06 |
| MET                   | TRINITY_DN95_c0_g1_i26   | methylthioribose-1-phosphate isomerase           | <i>mtnA</i>   | -9.34  | 3.10E-06 |
|                       | TRINITY_DN95_c0_g1_i11   |                                                  |               | -8.95  | 8.67E-06 |
|                       | TRINITY_DN95_c0_g1_i7    |                                                  |               | -8.88  | 1.04E-05 |
|                       | TRINITY_DN95_c0_g1_i1    |                                                  |               | -8.59  | 2.35E-05 |
|                       | TRINITY_DN95_c0_g1_i9    |                                                  |               | -4.71  | 6.22E-04 |
|                       | TRINITY_DN95_c0_g1_i6    |                                                  |               | -4.10  | 3.88E-03 |
|                       | TRINITY_DN95_c0_g1_i32   |                                                  |               | 9.82   | 8.42E-07 |
| HIS                   | TRINITY_DN9078_c0_g1_i1  | glyceraldehyde-3-phosphate dehydrogenase         | <i>gpdA</i>   | -9.26  | 3.74E-06 |
| TYR/PHE               | TRINITY_DN1765_c0_g1_i3  | 3-dehydroquinate dehydratase                     | <i>aroD</i>   | -9.10  | 5.81E-06 |
| VAL/LEU/ILE           | TRINITY_DN5050_c0_g1_i2  | dihydroxy-acid dehydratase                       | <i>ilvD</i>   | -8.97  | 8.19E-06 |
| CYS                   | TRINITY_DN1285_c0_g1_i27 | cysteine synthase                                | <i>cysK</i>   | -8.34  | 2.89E-06 |
|                       | TRINITY_DN1285_c0_g1_i15 |                                                  |               | 6.75   | 3.82E-06 |
|                       | TRINITY_DN1285_c0_g1_i25 | cystathionine beta-synthase                      | <i>cbs</i>    | -7.43  | 4.95E-05 |
|                       | TRINITY_DN1285_c0_g1_i43 |                                                  |               | 4.06   | 4.16E-03 |
| HIS                   | TRINITY_DN12621_c0_g1_i1 | 6-phosphogluconate dehydrogenase                 | <i>gnd</i>    | -6.99  | 1.63E-06 |
| SER                   | TRINITY_DN242_c0_g1_i39  | D-3-phosphoglycerate dehydrogenase               | <i>3-pgdh</i> | -6.95  | 1.48E-06 |
|                       | TRINITY_DN242_c0_g1_i28  |                                                  |               | -6.76  | 3.20E-06 |
|                       | TRINITY_DN242_c0_g1_i48  |                                                  |               | 7.49   | 9.10E-07 |
| SER                   | TRINITY_DN28_c1_g1_i14   | phosphoglycerate kinase                          | <i>pgk1</i>   | -5.10  | 2.41E-04 |
| ILE                   | TRINITY_DN800_c0_g1_i6   | acetolactate synthase                            | <i>ilvH</i>   | -5.05  | 7.27E-04 |
|                       | TRINITY_DN800_c0_g1_i1   |                                                  |               | -4.13  | 3.87E-03 |
| HIS                   | TRINITY_DN4830_c0_g2_i1  | hercynylcysteine S-oxide synthase                | <i>egt1</i>   | -4.72  | 8.88E-04 |
| PRO                   | TRINITY_DN217_c0_g1_i16  | 4-hydroxy-2-oxoglutarate aldolase                | <i>hoga1</i>  | -4.69  | 6.22E-04 |
|                       | TRINITY_DN217_c0_g1_i26  |                                                  |               | -4.56  | 1.46E-03 |
|                       | TRINITY_DN217_c0_g1_i11  |                                                  |               | -3.68  | 7.74E-03 |

| Amino acid metabolism | Transcript ID            | Description                                     | Gene ID       | LogFC | FDR      |
|-----------------------|--------------------------|-------------------------------------------------|---------------|-------|----------|
| PRO                   | TRINITY_DN217_c0_g1_i14  | 4-hydroxy-2-oxoglutarate aldolase               | <i>hogal</i>  | 5.32  | 2.31E-04 |
|                       | TRINITY_DN217_c0_g1_i35  |                                                 |               | 5.34  | 2.17E-04 |
|                       | TRINITY_DN217_c0_g1_i22  |                                                 |               | 6.42  | 1.36E-05 |
|                       | TRINITY_DN217_c0_g1_i18  |                                                 |               | 6.57  | 2.52E-05 |
|                       | TRINITY_DN217_c0_g1_i27  |                                                 |               | 6.89  | 2.29E-06 |
|                       | TRINITY_DN217_c0_g1_i32  |                                                 |               | 6.96  | 3.22E-05 |
|                       | TRINITY_DN217_c0_g1_i21  |                                                 |               | 7.08  | 9.35E-06 |
|                       | TRINITY_DN217_c0_g1_i23  |                                                 |               | 9.56  | 2.38E-08 |
|                       | TRINITY_DN217_c0_g1_i20  |                                                 |               | 10.43 | 3.84E-08 |
|                       | TRINITY_DN217_c0_g1_i5   |                                                 |               | 10.73 | 6.49E-08 |
| THR                   | TRINITY_DN38_c0_g1_i5    | O-acetylhomoserine/O-acetylserine sulfhydrylase | <i>met17</i>  | -3.84 | 7.67E-03 |
| HIS                   | TRINITY_DN11174_c0_g1_i1 | glutamine synthetase                            | <i>glnA</i>   | -3.71 | 8.67E-03 |
|                       | TRINITY_DN775_c0_g1_i2   | probable transketolase                          | <i>tktA</i>   | -3.67 | 7.65E-03 |
| MET                   | TRINITY_DN775_c0_g1_i2   | spermidine synthase                             | <i>speE</i>   | -3.67 | 7.65E-03 |
| GLY                   | TRINITY_DN2342_c0_g1_i3  | glutathionase                                   | <i>ggt</i>    | 3.66  | 8.26E-03 |
|                       | TRINITY_DN2342_c0_g1_i10 |                                                 |               | 3.82  | 7.35E-03 |
|                       | TRINITY_DN2402_c0_g1_i23 |                                                 |               | 4.53  | 1.09E-03 |
|                       | TRINITY_DN2342_c0_g1_i7  |                                                 |               | 5.05  | 3.14E-04 |
| CYS                   | TRINITY_DN2996_c0_g1_i1  | homoserine O-acetyltransferase                  | <i>metX</i>   | 3.69  | 8.91E-03 |
|                       |                          | homoserine O-succinyltransferase                | <i>metA</i>   | 3.69  | 8.91E-03 |
| GLU                   | TRINITY_DN9836_c0_g1_i1  | 5-oxoprolinase                                  | <i>oplah</i>  | 3.77  | 6.02E-03 |
| HIS                   | TRINITY_DN745_c2_g1_i33  | glutaminase                                     | <i>hisF/H</i> | 3.98  | 5.23E-03 |
|                       | TRINITY_DN2038_c0_g1_i3  | amidophosphoribosyltransferase                  | <i>purF</i>   | 4.19  | 2.73E-03 |
| GLY                   | TRINITY_DN681_c0_g1_i14  | peroxiredoxin                                   | <i>prx1</i>   | 4.73  | 7.03E-04 |
| MET                   | TRINITY_DN1888_c0_g2_i3  | homocysteine S-methyltransferase                | <i>mmuM</i>   | 4.75  | 1.12E-03 |
| TRP                   | TRINITY_DN1700_c0_g1_i5  | anthranilate synthase                           | <i>trpG</i>   | 5.63  | 1.83E-04 |
| HIS                   | TRINITY_DN345_c0_g1_i9   | 6-phosphogluconolactonase                       | <i>pgls</i>   | 6.23  | 2.52E-05 |
|                       | TRINITY_DN345_c0_g1_i5   |                                                 |               | 7.28  | 4.84E-06 |
|                       | TRINITY_DN345_c0_g1_i1   |                                                 |               | 7.52  | 6.93E-07 |
|                       | TRINITY_DN345_c0_g1_i2   |                                                 |               | 8.52  | 1.23E-07 |
| CYS                   | TRINITY_DN1197_c0_g1_i7  | cystathionine gamma-lyase                       | <i>cth</i>    | 7.20  | 3.63E-06 |
| VAL/LEU/ILE           | TRINITY_DN5216_c0_g2_i1  | branched-chain-amino-acid aminotransferase      | <i>ilvE</i>   | 12.83 | 4.55E-10 |
